# Supplementary material for: Role of Iron in the Reduction of Anemia Among Women of Reproductive Age in Low-Middle Income Countries: Insights From Systematic Review and Meta-Analysis
Source: Research Square preprint supplement (doi:10.21203/rs.3.rs-1157329/v1), 2021-12-29
Supplement: Supplementary file 1 [file bbbc7f71cb2a974ce8affb6e.xlsx]

## Sheet: Sheet2
Serial No	Title	Authors	Year	Design	Setting/Country	Intervention type	Followup duration	Age category	Type of participants	Blinding	Randomization method	n Grp 1 (orginal)	(n) Grp I (analysed)		(n) Grp II (original)	(n) Grp II (analysed)		Grp I to Grp II ratio	N	Preg/Non-preg	Baseline Grp I Hb	baseline Grp II (Hb)	BASELINE GRP III (Hb)	baseline gro IV (hb)	Measure of effect grp I (hb)			Measure of effect Grp II (Hb)/last followup		Measure of effect Grp III (Hb)/last followup		Measure of effect Grp IV (Hb)/last followup		SD Grp I	SD Grp II	SD grp III	SD grp IV	Sec outcome baseline Grp I				Sec outcome baseline Grp II				Sec outcome baseline Grp III
																									Rise in Hb		Last Follow Up	Rise in Hb	Last Follow Up	Rise in Hb	Last Follow Up	Rise in Hb	Last Follow Up					Fe	Ferritin	Serum Transferrin Receptor (ug/L)	Anemia Prevalance	Fe	Ferritin	Serum Transferrin Receptor	Anemia Prevalance	Fe	Ferritin	Serum Transferrin Receptor	Anemia Prevalence
1	Daily versus twice daily dose of ferrous sulphate supplementation in pregnant women: a randomised clinical trial	Adaji J A, Isah A Y, Agida E T, Otu T, Abdullahi H I.	2019	RCT	Nigeria	daily(Grp I) vs twice (Grp II) daily FeSO4 200 mg 65 mg elemental Fe vs 130	37 weeks gestation	16 to 45 years	all pregnant women between 14 and 24 weeks of gestation with Hb level ≥ 10g/dl and ≤14.5 g/dl	double (participants + staff reading investigations)	balloting	91	84		91	80			182		11.1 +/- 0.9	11.0 +/- 0.7					10.2		10.5					0.8	0.3			89.4+/- 41.2	54.8 +/- 46.9			80.0 +/- 24.5	60.7 +/- 52.7
2	Comparison of ferric Carboxymaltose and iron sucrose complex for treatment of iron deficiency anemia in pregnancy- randomised controlled trial	Jose, A., Mahey, R., Sharma, J. B., Bhatla, N., Saxena, R., Kalaivani, M., & Kriplani, A.	2019	RCT	Tertiary hospital/India	IV Ferric Carboxymaltose (Grp I)vs iron sucrose complex (II)	12 weeks	No specific age category is defined	Pregnant women (16 to 36 weeks og gestation ) with Hb > 6.0 g/dL and < 10.0 g/dL	open-label	computer-generated block randomization	50	50		50	50		01:01:00	100						29.6			22.1						8.2	8.2
3	Effect of directly observed oral iron supplementation during pregnancy on iron status in a rural population in Haryana: A randomized controlled trial	Ahamed F, Yadav K, Kant S, Saxena R, Bairwa M, Pandav CS.	2018	RCT	Community based/India	directly observed IFA supplementation (I)vs unobserved IFA supplementation (II)	100 days	No specific age category is defined	All pregnant women from 12 to 16 weeks gestation were eligible with Hb < 11 g/dL (Severly anemic Hb < 7 g/dL were excluded)	open-label	block randomization	200	184 PP	200 ITT	200	184		01:01:00	400		9.38 +/- 1	9.49 +/- 1			PP analysis: 0.98	ITT: 0.95		0.46						0.19	0.17				21.6(16)	2.5 (1.6)	171 (92.9)		25.2 (22.2)		169 (91.8)
4	Efficacy of iron-supplement bars to reduce anemia in urban Indian women: a cluster-randomized controlled trial	Mehta R, Platt AC, Sun X, Desai M, Clements D, Turner EL.	2017	RCT	India	nonheme iron–supplement bars 1 iron-supplement bar/d (GudNeSs bars) (Grp I) vs no intervention (no placebo either)	90 days	18 to 35 years	Non-pregnant with Hb <12 g/dL	none	cluster	95	65		84	71			179		10.5 ± 1.2	10.5 ± 1.3					11.9		10.5					0.7	1
5	Efficacy and safety of ferrous asparto glycinate in the management of iron deficiency anaemia in pregnant women	S. P. Kamdi & P. J. Palkar	2015	RCT	Maharashtra and Gujarat, India	ferrous asparto glycinate (Grp I) vs ferrous ascorbate (Grp II)	28 days	18 to 30 years	pregnant women from 12 to 26 weeks gestation with Hb < 11 g/dL	double blind	stratification and matching	31	26		30	24			61		8.38 ± 1.41 g/dl	8.27 ± 1.20			2.43 +/- 0.61		10.81 +/- 2.02	1.21 +/- 0.48	9.48 +/- 1.68										9.86 +/- 3.30 ng/ml				10.56+/- 5.53 ng/ml
6	Relative Efficacy of Micronutrient Powders versus Iron—Folic Acid Tablets in Controlling Anemia in Women in the Second Trimester of Pregnancy	Choudhury N, Aimone A, Hyder SM, Zlotkin SH.	2012	RCT	Rural/ Central Bangladesh	micronutrient powder (containing iron,folic acid, vitamin C, and zinc) (Grp I) vs iron and folic acid tablets (Grp II)	32 weeks gestation	No specific age category is defined	All pregnant women between 14 and 22 weeks of gestation with Hb > 7 g/dL and < 14.0 g/dL	Not specified	cluster	243	207		235	198			478		109.4 ± 14.0	111.6 ± 13.7					109.5 g/L		112					12.9	11.2						121 (50.0)				92 (39.1)
7	Oral versus high dose parenteral iron supplementation in pregnancy	Kumar A, Jain S, Singh NP, Singh T.	2005	RCT	India	daily oral iron therapy of 100 mg of elemental iron (Grp I) vs 2 doses of 250 mg of iron sorbitol intramuscularly (Grp II)	36 weeks gestation	Specific age category is not defined	All pregnant women between 16—24 weeks gestation with Hb 8 to 11 g/dL	Not specified	not specified	98	75		212	75			220		9.89 +/- 0.75 g%	9.60 +/- 0.77			1.18 +/- 0.68		11.20 +/- 0.82	1.34 +/- 0.77	10.94 +/- 0.56									56.25+/- 6.78 ug/dl (n=20)	10.93+/-3.05 ug/L (n=20)			57.60 +/- 10.81 (n=20)	11.67 +/- 3.48
8	Erythrocyte indices in pregnancy: Effect of intermittent iron supplementation	Mukhopadhyay A, Bhatla N, Kriplani A, Pandey RM, Saxena R.	2004	RCT	India	100 mg elemental iron daily (Grp I) vs 200 mg elemental iron weekly (Grp II)	32-34 weeks gestation	Specific age category is not defined	All pregnant women < 20 weeks of gestation. Hb < 10 g/dL excluded	Single: technician performing the laboratory tests was not aware of the group. Rest not specified	block randomization	55	40		56 randomized. Received: 55	40			111		11.3 +/- 1.4 g/dl	11.6 +/- 0.9)			0.3 g/dL +/- 1.4 g/dL		11.7	− 0.2 +/- 1.4 g/dL	11.4					1.1	1.3				18.4 ng/ml (21.9)				9.9 (8.7)
9	Regular consumption of NaFeEDTA-fortified fish sauce improves iron status and reduces the prevalence of anemia in anemic Vietnamese women	Thuy, P. V., Berger, J., Davidsson, L., Khan, N. C., Lam, N. T., Cook, J. D., Hurrell, R. F., & Khoi, H. H.	2003	RCT	Vietnam	iron-fortified (Grp I) received daily 10 mL of fish sauce fortified with 10 mg Fe vs control group (Grp II) who received daily 10 mL of nonfortified fish sauce.	6 months	17 to 49 years	Non-pregnant women factory workers with Hb > 8.to < 20 g/dL)	double blind	not specified	76	64		76	72			152		110.7 g/L ± 8.0	110.4 ± 8.7					116.3		107.6					8.7	11				13.6 ug/L (10.1, 18.2)		1		14.6 (11.0, 19.4)		1
10	Daily Iron Supplementation Is More Effective than Twice Weekly Iron Supplementation in Pregnant Women in Pakistan in a Randomized Double-Blind Clinical Trial	Mumtaz Z, Shahab S, Butt N, Rab MA, DeMuynck A.	2000	RCT	tertiary care hospital, peri-urban and rural Northern Pakistan	daily (grp I) vs twice-weekly (Grp II) iron supplementation 200 mg ferrous sulphate	12 weeks	17 to 35 years	Pregnant women with 20 weeks gestation and above with Hb < 11.0 g/dL	double blind	random number generation	100	100		91	91			191		92.6 g/L +/- 14.1	95.8 +/- 10.6					113.6		100.9					18.3	12.3				23.8 ug/L +/- 29.7 (n=68)				23.0 +/- 33.7 (n=61)
11	The Use of NaFeEDTA-Fortified Fish Sauce Is an Effective Tool for Controlling Iron Deficiency in Women of Childbearing Age in Rural Vietnam>	Van Thuy P, Berger J, Nakanishi Y, Khan NC, Lynch S, Dixon P.	2005	RCT	Vietnam	NaFeEDTA-fortified fish sauce (Grp I) vs unfortified fish sauce (Grp II)	18 months	16 to 49 years	non-pregnant women from households with Hb < 12.0 g/dL	Not specified	not specified	288	199		288	190			576		125.6 (124.4–126.8) FORTIFIED GRP	126.3 (125.0–127.5) CONTROL GRP					131.1 (129.5–132.7)		128.6 (126.9–130.4)										29.8 (24.8–35.7)				25.3 (20.8–30.7)
12	Efficacy and trial effectiveness of weekly and daily iron supplementation among pregnant women in rural Bangladesh: disentangling the issues	Ekström, E. C., Hyder, S. M., Chowdhury, A. M., Chowdhury, S. A., Lönnerdal, B., Habicht, J. P., & Persson, L. A.	2002	RCT	rural areas/Mymensingh thana (subdistrict), Bangladesh.	weekly 2 supplements 60 mg Fe and 250 μg folic acid (grp I) vs daily 1 supplement (Grp II)	12 weeks	Specific age category is not defined	Pregnant women with a fundal height of 14 and 22 cm (gestational age of 18–24 wk) were enrolled. Hb < 8.0g/dL were excluded	Not specified	not specified	105	74		104	66			209		112.6 ± 13.9	110.4 ± 12.7					122.6		124.8					16.1	16.1						0.42				0.5
13	A Micronutrient-Fortified Beverage Prevents Iron Deficiency, Reduces Anemia and Improves the Hemoglobin Concentration of Pregnant Tanzanian Women	Makola, D., Ash, D. M., Tatala, S. R., Latham, M. C., Ndossi, G., & Mehansho, H.	2003	RCT	Tanzania	micronutrient-fortified 11 micronutrients including Fe (experimental) group vs nonfortified (control) group.	8 weeks	Specific age category is not defined	All pregnant women with gestation of 12 to 34 weeks and Hb < 11.0g/dL included. Participants with hemoglobin less than 8 g/dL were excluded	double blind	block randomization	227	127		212	132			439		105 g/L (14.2)	105 (14.9)			8.6		114	4.5	109					14	15.1				18.47 (2.31) (n=118)				18.91 (2.4)
14	Effect of Daily Antenatal Iron Supplementation on Plasmodium Infection in Kenyan Women A Randomized Clinical Trial	Mwangi, M. N., Roth, J. M., Smit, M. R., Trijsburg, L., Mwangi, A. M., Demir, A. Y., Wielders, J. P., Mens, P. F., Verweij, J. J., Cox, S. E., Prentice, A. M., Brouwer, I. D., Savelkoul, H. F., Andang'o, P. E., & Verhoef, H.	2015	RCT	rural/Kenya	iron (60 mg of elemental iron as ferrous fumarate (Grp I) vs placebo (Grp II)	1 month postpartum	15 to 45 years	gestational age of 13 to 23 weeks with Hb ≥ 9 g/dL	double blind	simple randomization	237	237		233	233			470		11.39 (1.09)	11.25 (1.19)					12.08		11.15					Effect (95 CI): 0.93 (0.59 to 1.26)
15	Leaf Concentrate Fortification of Antenatal Protein-Calorie Snacks Improves Pregnancy Outcomes	Magon A, Collin SM, Joshi P, Davys Late G, Attlee A, Mathur B.	2014	RCT	Rajasthan/India	RTE snack fortified with 7 g Leaf concentrate (Grp I) vs RTE snack (102 g wheat flour, 18 g soya flour) (Grp II)	35-36 weeks of pregnancy	18 to 35 years	Pregnant women from 14 to 16 weeks gestation were recruited, Hb < 8.5g/dL	double blind	consecutively-numbered sealed enevlops/ Block randomization	50	45		53	47					8.83 (1.77)	8.38 (1.41)			0.27 (0.08, 0.46)		8.99	−0.59 (−0.82, −0.35)	7.75					1.58	1.16
16	A Comparative Evaluation of Multiple Micronutrient and Iron–Folic Acid Supplementation during Pregnancy in Pakistan: Impact on Pregnancy Outcomes	Bhutta, Z. A., Rizvi, A., Raza, F., Hotwani, S., Zaidi, S., Moazzam Hossain, S., Soofi, S., & Bhutta, S.	2009	RCT	urban and rural Sindh/Pakistan	multiple micronutrient supplements (Grp II) vs iron–folic acid (Grp I)	postnatal visit	women of reproductive age 15 to 49 years	pregnant with < 24 weeks of gestation and Hb < 11 g/dL	double blind	Block randomization random allocation of poulation in clusters according to Block randomization code in groups of 20	1148	466		1230	522			2699		10.7± 1.6	10.8 ± 1.5					10.9		10.9					1.6	1.6				24.7 ± 26.9				28 ± 24.4
17	A prospective, partially randomized study of pregnancy outcomes and hematologic responses to oral and intramuscular iron treatment in moderately anemic pregnant women	Sharma JB, Jain S, Mallika V, Singh T, Kumar A, Arora R, Murthy NS	2004	Partially randomized trial	New Delhi	3 intramuscular doses of 250 mg elemental Fe as iron dextran at 1 month intervals plus oral doses of 5 mg folic acid twice weekly (Gp I) vs daily oral dose of 100 mg elemental Fe and 500 microgram folic acid (Gp II)	37 - 41 weeks	18 to 40 years	pregnant women between 16 and 24 weeks gestation with Hb from 8.0 to 10.9 g/dL	Not specified	Partial randomization	106	100		148	100			254		94.3 g/L ±9.47	96.3 g/L ± 8.79					104.2 +/- 10.98		102.9 +/- 10.84					10.98	10.84			25.0 +/- 1.90 µmol/L	7.0 +/-1.67 µg/L			34.3 +/- 1.50 µmol/L	7.5 +/- 1.84 µg/L
18	Changes in iron status during pregnancy in peruvian women receiving prenatal iron and folic acid supplements with or without zinc.	Zavaleta N, Caulfield LE, Garcia T	2000	RCT	Villa El Salvador/Lima/Peru	daily oral supplements of 60 mg Fe (as ferrous sulfate) and 250 mg folic acid (Grp 1) vs same amount of iron and folic acid along with 15 mg Zn (as zinc sulphate) Grp II	10 - 24 weeks, 28-30 weeks 37- 38 weeks, 4 weeks postpartum	15 to 35 years	pregnant women from 10 to 24 weeks of gestation with Hb < 11.0 g/dL	double blind	not specified	325	325		320	320			645		116 g/L +/- 12	115 g/L +/- 14			-2 +/ - (-1)		114 ± 13	0 +/- (-1)	115 ± 13					13	13				21.8 µg/L (8.9, 53.3) median with -1 and +1 SD in parenthesis		0.33		19.7 µg/L (7.7, 50.0) median with -1 and +1 SD in parenthesis
19	Concomitant supplemental vitamin A enhances the response to weekly supplemental iron and folic acid in anemic teenagers in urban Bangladesh.	Ahmed F, Khan MR, Jackson AA	2001	RCT	Dhaka/ Bangladesh	2 * 2 factorial design and 4 groups: placebo (a placebo for vitamin A and for iron and folic acid) (Gp IV), vitamin A only (2.42 mg retinol as retinyl palmitate and a placebo for iron and folic acid) (Gp III), iron + folic acid (120 mg elemental Fe as ferrous sulfate, 3.5 mg folic acid, and a placebo for vitamin A) (Gp II), and iron + folic acid + vitamin A (Gp I)	12 weeks			double blind	not specified		77			Gp II 74, Gp III 67, Gp IV 71			289/480		111 g/L +/- 10	113 g/L +/- 8	113 g/L +/- 9	111 +/- 9	12.2 +/- 10		123 +/- 9	9.1 +/-7.8	122 g/L +/- 7	3.3 +/- 7.3	116 +/- 12	1.2 +/-7.7	112 +/- 10	9	7	12	10	6.7 +/-3.5 µmol/L	7.3 +/- 9.2 µg/L			6.6 +/-3.5 µmol/L	8.7 +/- 13.5 µg/L			6.8 +/- 3.7 µmol/L	10.7 +/- 14.0 µg/L
20	Dual fortification of salt with iron and iodine in women and children in rural Ghana	Asibey-Berko E, Zlotkin SH, Yeung GS, Nti-Nimako W, Ahunu B, Kyei-Faried S, Johnston JL, Tondeur MC, Mannar V.	2007	RCT	Sekyere west district Ghana	3 groups. Daily intake of salt 10g/person/day. Double fortified salt with iron (contain 70mg iron per week) and iodine plus weekly placebo (Gp I), iodized salt plus weekly 70 mg iron supplement (Gp II), or iodized salt plus weekly placebo (control) (Gp III)	8 months	15 to 45 years	Non-pregnant, non lactating, Hb is <10 g/dL	double blind	cluster	100	61		Gp II 100, Gp III 100	GP II 65, Gp III 58			300		125 g/L +/-12	122 +/- 11	127 +/- 11	-	not given			not given			not given			-	-	-					0.344				0.354				0.19
21	Effect of low‐dosage vitamin A and riboflavin on iron‐folate supplementation in anaemic pregnant women.	Suprapto B	2002	RCT	Rural area/ Indoneshia	4 groups: Grp IFRA received iron-folate tablets + 5 mg riboflavin + 2.75 mg retinyl palmitate (vitamin A) (Gp I), Grp IFA received iron-folate tablets + 2.75 mg retinyl palmitate (equal to 5000 IU vitamin A) (Gp II), Grp IFR received iron-folate tablets + 5 mg riboflavin (Gp III), Gp IF received iron-folate tablets + 5 mg glucose (placebo) (Gp IV)	60 days	≤ 35 years	Pregnant between 13 and 28 weeks, Hb is < 11 g/dL	double blind	women were numbered and listed then allocated alternately into groups according to their numbers	23	19		Gp II 29, Gp III 22, Gp IV 29	Gp II 18, Gp III 22, Gp IV 25			103		10.39 ± 0.41 g/dL	10.39 ± 0.44 g/dL	10.20 ± 0.59 g/dL	10.40 ± 0.54 g/dL	0.463 ± 0.750 g/dL		10.86 ± 0.75 g/dL	0.194 ± 0.733 g/dL	10.59 ± 0.93 g/dL	0.818 ± 0.673 g/dL	11.02 ± 0.95 g/dL	0.492 ± 0.983 g/dL	10.89 ± 0.95 g/dL	0.75	0.733	0.673	0.983	not given	not given	not given	not given	not given	not given		not given	not given	not given
22	Fermented soyabean and vitamin C-rich fruit: a possibility to circumvent the further decrease of iron status among iron-deficient pregnant women in Indonesia.	Wijaya-Erhardt M, Muslimatun S, Erhardt JG.	2011	RCT	Karanganyar and Demak, of Central Java Province, Indonesia	(Optimized food) was given 6 d/wk comprised 600 g of tempeh, 30 g of meat, 350 g of guava, 300 g of papaya and 100 g of orange (Grp I). Both groups had free access to receive tablets containing 60 mg of Fe and 250mg of folic acid as part of the Ministry of Health package of prenatal care	36 weeks gestation	15 to 49 years	All women at 12–20 weeks of gestation were recruited without considering their anaemia status.	double blind	at village/cluster level	127	110		125	117			250		125.31 g/L +/-1.14 (n=103)	118.71 g/L +/- 1.14 (n=110)			1.03 g/L		121.76 +/- 1.13	1.01 g/L	117.41 +/- 1.11					95% CI (1.00, 1.06)	95% CI (0.99, 1.04)			5.64 mg/kg body wt +/- 2.77 (n=110)	38.19 +/- 1.92 µg/L	5.29 +/- 1.23 mg/L	0.107	5.79 mg/kg body wt +/- 2.91	38.12 +/- 1.95 µg/L	5.08 +/- 1.27 mg/L	0.227
23	Milk fortified with iron or iron supplementation to improve nutritional status of pregnant women: an intervention trial from rural Vietnam.	Hoa PT, Khan NC, van Beusekom C, Gross R, Conde WL, Khoi HD.	2005	RCT	Thai Binh Province, rural area Northern Vietnam	group received daily 400 ml of milk fortified with 15 mg iron (IM) (Grp I), group received daily the same volume of nonfortified milk (M) (Grp II); group received one daily iron-folic acid supplement (00 mg of ferrous sulfate (60 mg of elemental iron) and 250 μg of folic acid) in pill form (IS) (Grp III); and group received one placebo tablet (P) (Grp IV-control grp).	16 weeks gestation	20 to 32 years	Between 14th and 18th weeks pregnant, Hb is < 7.0 g/dL	single blind	at commune/block level randomization	50	44		Gp II 52, Gp III 49, Gp IV 51	Gp II 41, Gp III 40, Gp IV 43			202		mean (sd) 117.4 ± 6.7 g/L	117.5 +/- 10.6 g/L	116.3 +/- 8.9 g/L	115.5 +/-7.5 g/L	− 0.5 g/L +/- 0.9		112.1 +/- 8.4 g/L	−1.2 g/L +/- 0.9	105.2 +/- 11.3 g/L	−0.3 g/L +/- 0.9	113.3 +/-8.8 g/L	− 1.1 +/- 0.8	104.1 +/-10.0 g/L	8.4	11.3	8.8	10
24A	Periconceptional iron supplementation does not reduce anemia or improve iron status among pregnant women in rural Bangladesh.	Khambalia AZ, O’Connor DL, Macarthur C, Dupuis A, Zlotkin SH.	2009	RCT	rural Bangladesh	daily iron and folic acid (IFA; 60 mg ferrous fumarate and 400 µg folic acid) (Grp I) vs folic acid (FA; 400 µg) in the form of a powdered supplement added to food (Grp II)	for 9 months or untill they become pregnant		Hb < 12.0 g/dL for nonpregnant women < 11.0 g/dL for pregnant women	double blind	random assignment	134	118		138	116			272	Pregnant:	n=43, median (IQR) 122.0 g/L (116.0 to 130.0)	n= 45, median (IQR) 125.0 g/L (116.0 to 129.0)			−8.0 (−18.0 to 0.0)		median (IQR) 112.0 (105.0 to 124.0)	−10.0 (−13.0 to −5.0)	median (IQR) 114.0 g/L (108.0 to 123.0)					-	-				median (IQR) 36.8 µg/L (24.3 to 54.9) (n=39)	Median (IQR) 3.2 mg/L (2.5 to 3.7) (n=40)	44.2% (n=45)		median (IQR) 37.3 µg/L (24.9 to 61.4) (n=38)	median IQR 3.4 mg/L (2.3 to 4.0) (n=41)	31.1% (n=43)
24B	Periconceptional iron supplementation does not reduce anemia or improve iron status among pregnant women in rural Bangladesh.	Khambalia AZ, O’Connor DL, Macarthur C, Dupuis A, Zlotkin SH.																		non-pregnant:	n = 75 median IQR 122.0 g/L (117.0 to 129.0)	n = 71 median IQR 123.0 g/L (113.0 to 128.0)			2.0 (−4.0 to 8.0)		median (IQR) 126.0 (119.0 to 133.0)	2.0 (−4.0 to 8.0)	median (IQR) 124.0 g/L (115.0 to 130.0)					-	-				median IQR 34.0 µg/L (25.6 to 50.5) (n=59)	median IQR 3.0 mg/L (2.5 to 3.7) (n=68)	37.3% (n= 71)		median IQR 45.6 µg/L (25.0 to 61.3) (n=58)	median IQR 2.9 mg/L (2.5 to 3.8) (n=64)	35.2% (n=75)
25	Impact of small-quantity lipid-based nutrient supplement on hemoglobin, iron status and biomarkers of nflammation in pregnant Ghanaian women	Adu‐Afarwuah S, Lartey A, Okronipa H, Ashorn P, Zeilani M, Baldiviez LM, Oaks BM, Vosti S, Dewey KG.	2017	partially double-blind, parallel, individually randomized, controlled trial with three equal-size groups	Ghana	SQ-LNS (Small-Quantity Lipid-based Nutrient Supplements) with MMN supplement (Grp I), multiple micronutrient capsule (MMN supplement) containing 18 vitamins and minerals (including 20mg iron) (Grp II), 60 mg iron plus 400-μg folic acid (IFA supplement (Grp III)	36 weeks gestation	≥ 18 years	pregnancy with ≤ 20 weeks gestation, Hb is < 11.0 g/dL	partially double blind	block randomization/ computer-generated randomization scheme (in blocks of nine), sealed in nine envelops	354	354		Gp II 354, Gp III 349	Gp II 354, Gp III 349			1057		112 g/L +/- 12 (n=354)	111 g/L +/- 12 (n=354)	112 g/L +/- 13 (n=349)				115 g/L +/- 12 (n=206)		117 +/-12 (n=291)		120 +/- 11 (n=270)			12	12	11				4.3 mg/L +/-3.5 (n=346)				4.0 mg/L +/- 1.7 (n=348)				4.0 mg/L +/-1.9 (n= 338)
26	An Animal-Source Food Supplement Increases Micronutrient Intakes and Iron Status among Reproductive-Age Women in Rural Vietnam.	Hall AG, Ngu T, Nga HT, Quyen PN, Hong Anh PT, King JC	2017	RCt	rural Vietnam	5 days/ wk Animal Source Food (mean: 144 kcal, 8.9 mg Fe, 2.7 mg Zn, 1050 µg retinoic acid equivalent vitamin A, and 5.5 µg vitamin B-12) (Gp I) vs control snack (mean: 150 kcal, 2.0 mg Fe, 0.9 mg Zn, 0 µg retinoic acid equivalent vitamin A, and 0 µg vitamin B-12)	6 months	18 to 30 years	Non-prgnant women, Hb < 12 g/dL	unmasked	individuals, stratified by commune health system, randomly assigned to two grps by using the random-number generator in Excel.	59	47		58	42			117		Mean (95%CI) 13.0 (12.8, 13.2) g/dL	Mean (95%CI) 13.1 (12.8, 13.4) g/dL					mean (95% CI) 13.8 (13.6, 14)		mean (95%CI) 13.5 (13.3, 13.8) g/dL										means (95% CIs) 44.8 (36.3, 55.3) ng/ml	means (95% CIs) 4.9 (4.6, 5.2) µg/ml	15.3 % (95% CI: 8.4, 27.8)		means (95% CIs) 46.8 (36.2, 60.5) ng/ml	means (95% CIs) 4.9 (4.5, 5.3) µg/ml	15.5% (95% CI:8.5, 28.3)
27	Treatment response to standard of care for severe anemia in pregnant women and effect of multivitamins and enhanced anthelminthics.	Christian P, Shahid F, Rizvi A, Klemm RD, Bhutta ZA.	2009	RCT	Peri-urban Karachi	iron-folic acid (50 mg of ferrous fumarate or 100 mg for severe anemia and 0.5 mg folic acid), mebendazole 100 mg twice daily for 3 d, and multivitamins daily for 3 months (Gp I), iron-folic acid, mebendazole 500 mg (single dose), and NO multivitamins (Gp II), Iron-folic acid, Mebendazole 100 mg twice daily for 3 d, and placebo (Gp III), ron-folic acid, mebendazole 500 mg (single dose), and place…	60 or 90 days	All women of reproductive age group	pregnancy with ≤ 20 weeks gestation, Hb is < 7.0 g/dL	triple blind	Block randomization- women were randomly assigned, in blocks of 4. A list having 800 numbers, ranging from 1 to 4, and generated in randomly arranged blocks of 4, was created.	274	265		Gp II 273, Gp III 272, Gp IV 275	Gp II 254, Gp III 261, Gp IV 258			574		61 +/- 6.9 g/L (n=274)	62 +/- 8 g/L (n= 273)	62 +/- 8 g/L (n= 272)	61 +/- 9 g/L (275)	Adjusted Beta coefficents (SE) 0.45 (0.03)		88 +/- 6.24 g/L (n=265)	Adjusted Beta coefficents (SE) 0.43 (0.03)	88 +/- 22 g/L (n=254)	Adjusted Beta coefficents (SE) 0.48 (0.03)	99 +/- 22 g/L (n=261)	Adjusted Beta coefficents (SE) 0.40 (0.03)	86 +/- 24 g/L (n= 258)
28	The effect of intermittent antenatal iron supplementation on maternal and infant outcomes in rural Viet Nam: a cluster randomised trial.	Hanieh S, Ha TT, Simpson JA, Casey GJ, Khuong NC, Thoang DD, Thuy TT, Pasricha SR, Tran TD, Tuan T, Dwyer T	2013	RCT	Ha Nam province, Viet Nam	One capsule of MMNs taken twice a week (60 mg elemental iron plus 1.5 mg folic acid plus a variation of the dose of micronutrients in the UNIMMAP daily supplement (Grp I). One capsule of IFA taken twice a week (60 mg elemental iron plus 1.5 mg folic acid per capsule (Gp II), One tablet of IFA taken daily (60 mg elemental iron plus 0.4 mg folic acid per tablet(Control gp III)	32 weeks gestation			not blinded for daily supplements, triple blinded for intermittent supplements	at commune level	407	324		Gp II 425, Gp III 426	Gp II 369, Gp III 349			1258		NO data of baseline for each group
29	Vitamin A and iron status are improved by vitamin A and iron supplementation in pregnant Indonesian women.	Tanumihardjo SA	2002	RCt	Indonesia	vitamin A plus iron (A + Fe) (Grp I), 1.07 mmol (60 mg) ferrous sulfate with a vitamin A placebo (Fe) (Grp II), 8.4 µmol (8000 IU) vitamin A as retinyl palmitate with an iron placebo (A) (Grp III), Placebo (P) (Grp IV)	8 weeks	18 to 37 years	Pregnant women in the second or early third trimester (17.6 ± 3.9 wk gestation), Hb cut off not defined in inclusion	double blind	Randomly assigned at individual level but method is not specified	8	8		Gp II 5, Gp III 7, Gp IV 7	Gp II 5, Gp III 7, Gp IV 7			27		105 +/- 4.7 g/L	112 +/- 9.9	102 +/- 4.1	113 +/- 11.8			119 +/- 3.2		118 +/- 6.7		109 +/- 6.0		104 +/- 11.0	3.2	6.7	6	11		22.6 +/- 8.6 µg/L				28.8 +/- 9.4 µg/L				22.6 +/- 24.8 µg/L
30	Impact of Preconception Micronutrient Supplementation on Anemia and Iron Status during Pregnancy and Postpartum: A Randomized Controlled Trial in Rural Vietnam.	Nguyen PH, Young M, Gonzalez-Casanova I, Pham HQ, Nguyen H, Truong TV, Nguyen SV, Harding KB, Reinhart GA, Martorell R, Ramakrishnan U.	2016	RCt	rural Vietnam	3 grps for weekly pre-pregnancy supplementation: MM Multiple micronutients (15 micronutrients based on UNIMMAP with similar amounts of IFA as in other groups) (Grp I), IFA (60 mg Fe and 2800 μg FA) (Grp II), 2800 μg FA (control group) (Grp III)	till 3 months post partum	18 to 40 years	married women planning to get pregnant in next year, Hb cut off is not defined	double blind	at individual level eligible women randomly assigned
						Once women became pregnant they stopped weekly preconception supplementation and started receiving prenatal supplements containing 60 mg of iron and 400 ug of FA to be taken daily through delivery	pre-pregnancy till 3 months post partum				at individual level	508	425		Gp II 518, Gp III 555	Gp II 420, Gp III 425			1581		12.91 +/- 1.38 g/dL	12.91 +/- 1.38 g/dL	13.04 +/- 1.26				12.33 +/- 1.27 g/dL		12.34 +/- 1.24		12.35 +/- 1.28			1.27	1.24	1.28			mean 66.31 µg/L (95% CI: 61.92, 71.01)	4.90 ± 1.82 mg/L	0.2143		mean 64.07 µg/L (95% CI: 60.09, 68.32)	4.74 ± 1.48 mg/L	0.2		mean 66.89 µg/L (95% CI 61.98, 70.04)	4.67 ± 1.56 mg/L	0.1718
31	Daily versus intermittent iron supplementation in pregnant women: Hematological and pregnancy outcome	Mukhopadhyay A, Bhatla N, Kriplani A, Pandey RM, Saxena R.	2004	RCT	New Delhi, India	200 mg elemental iron weekly (Grp I) vs 100 mg elemental iron daily (Grp II)	32 - 34 weeks of gestation	Specific age category is not defined	All pregnant women before 20 weeks of gestation, hemoglobin level < 10 g/dL were excluded	unclear	Block randomization (block size = 10)	56	40		55	40			111	pregnant females	mean 25 years +/- 2.9	mean (sd) 11.6 +/- 0.9 g/dL	11.3 /- 1.0 g/dL	− 0.2 g/dL +/- 1.5 g/dL		11.4 +/- 1.3 g/dL	0.4 g/dL +/- 1.5 g/dL	11.7 +/- 1.1 g/dL	1.3	1.1 g/dL		mean (sd) 9.9 ng/ml +/- 8.7		0.25		mean (sd) 18.4 ng/ml +/- 21.9		0.425		mean (sd) 9.2 ng/ml +/- 12.5			0.425			mean (sd) 21.2 ng/ml +/- 26.2		0.25
32	Comparison of Efficacy, Tolerability, and Cost of Iron Polymaltose Complex With Ferrous Sulphate in the Treatment of Iron Deficiency Anemia in Pregnant Women	Saha L, Pandhi P, Gopalan S, Malhotra S, kumar Saha P	2007	RCT	Chandigarh, India	(Grp I) Iron polymaltose Complex 100 mg elemental iron + folic acid 500 mcg, was given for 8 weeks (1 tablet orally once daily). Group II received Ferrous Sulphate 60 mg elemental iron + folic acid 500 mcg, for 8 weeks (1 tablet orally twice daily makes 120mg). Folic acid was also given to both groups.	27 weeks gestation / 8 weeks followup	2o to 40 years	Pregnant women with 14 to 27 weeks gestation and Hb < 9 g/dL	double blind	unclear	48	48		52	52			100	pregnant	20-24 years	8.47 +/- 0.72 g/L	8.39 +/- 0.74 g/L	2.72 ± 0.55		11.19 ± 0.67	2.9 ±0.46	11.24 ± 0.61	0.67	0.61		mean (sd) 10.93 ng/ml ± 4.14				mean (sd) 11.38 ng/ml ± 8.5				change: 22.59 ± 6.8 // last fup: mean (sd) 33.52 ng/ml ± 10.57						change: 16.84 ± 7.9 // last fup: mean (sd) 28.22 ng/ml ± 10.40
[truncated: 18 more columns]
