# Supplementary material for: Role of Iron in the Reduction of Anemia Among Women of Reproductive Age in Low-Middle Income Countries: Insights From Systematic Review and Meta-Analysis
Source: Research Square preprint supplement (doi:10.21203/rs.3.rs-1157329/v1), 2021-12-29
Supplement: Supplementary file 2 [file d9467178ff73f9b8e43809f2.xlsx]

## Sheet: Sheet1
Serail number	Author	Study Name	Study Design	Year	Randomization Method	Allocation Concealment	Blinding of participants and personnel	Blinding of outcome assessors (those who measure outcome)	Incomplete outcome data SELF OBSERVE	Selective outcome reporting	Other bias? SELF OBSERVE
1	Adaji JA et al 2019	DAILY VERSUS TWICE DAILY DOSE OF FERROUS SULPHATE SUPPLEMENTATION IN PREGNANT WOMEN: A RANDOMISED CLINICAL TRIAL	RCT	2019	LOW- Balloting	LOW- Keeping 20 allocation slips with pre-assigned study allocations (10 per arm) in opaque containers. Sequential participants were asked to draw an allocation slip from the container without possibility of replacement.	LOW- partcipants were kept blind	LOW- Laboratory staff reading blood invetigations was kept unware of the treatment allocation during trial	LOW- 90% of recruited participants had follow up	LOW- all outcomes were reported	LOW- no other sources of bias noted
2	Jose A et al 2019	Comparison of ferric Carboxymaltose and iron sucrose complex for treatment of iron deficiency anemia in pregnancy- randomised controlled trial	RCT	2019	Low- computer-generated block randomization	HIGH- no concealment done	HIGH-Open label	HIGH-open label	LOW- all particpants recruited were followedup	LOW- all outcomes were reported	LOW- no other sources of bias noted
3	Ahamed et al 2018	Effect of directly observed oral iron supplementation during pregnancy on iron status in a rural population in Haryana: A randomized controlled trial	RCT	2018	LOW - block randomization	LOW - Random sequences were generated per ASHA (health worker) and pregnant women were recruited based on the random sequence into control and intervention groups.	HIGH-Open label	HIGH-Open label	LOW - 92% particpants were followed up	LOW- all outcomes were reported
4	Mehta R et al	Efficacy of iron-supplement bars to reduce anemia in urban Indian women: a cluster-randomized controlled trial	RCT	2017	LOW - clusters in each pair were first listed in a fixed order with the first cluster assigned to the intervention arm and the second cluster assigned to the control arm. A virtual coin flip was generated for each cluster pair with the use of a pseudorandom number generator software, whereby each cluster pair was uniformly assigned a number between 0 and 1.	HIGH- no concealment done	HIGH-No blinding	HIGH-unable to blind data collectors or study statisticians to treatment conditions.	LOW-76% of participants were followed up	LOW- all outcomes were listed	LOW- no other sources of bias noted
5	Kamdi SP et al	Efficacy and safety of ferrous asparto glycinate in the management of iron deficiency anaemia in pregnant women	RCT	2015	LOW-Stratification based on age and bodyweight and matching on age and hemoglobin levels	LOW-Codes A and B were assigned to treatments	LOW-double blind	LOW-double blind	LOW-82% was followup rate	LOW- all outcomes were listed
6	Choudhury N et al	Relative Efficacy of Micronutrient Powders versus Iron—Folic Acid Tablets in Controlling Anemia in Women in the Second Trimester of Pregnancy	RCT	2012	UNCLEAR-randomly assigned but authors hav not described procedure	UNCLEAR-No details are given for allocation	UNCLEAR- Not specified about blinding	UNCLEAR- Not specified about blinding	LOW- 84% followup	LOW- all outcomes were reported	LOW- no other sources of bias noted
7	Kumar A et al	Oral versus high dose parenteral iron supplementation in pregnancy	RCT	2005	UNCLEAR-randomly allocated to two groups but procedure is not specified	UNCLEAR- Authors have not described allocation concealment	UNCLEAR- No details are provided about blinding of participants and personnel	UNCLEAR - No details are provided about blinding of outcome assesors	HIGH- 52% were loss to followup	LOW-all outcomes were measured	LOW- no other sources of bias noted
8	Mukhopadhyay A et al	Erythrocyte indices in pregnancy: Effect of intermittent iron supplementation	RCT	2004	LOW- Block randomization	UNCLEAR- No information specified about allocation	UNCLEAR- No details are specified about blinding of participants and personnel	LOW-technician performing the laboratory tests was not aware of the group tretament	LOW- 70% was followup rate	LOW-all outcomes were measured	LOW- no other sources of bias noted
9	Thuy PV et al	Regular consumption of NaFeEDTA-fortified fish sauce improves iron status and reduces the prevalence of anemia in anemic Vietnamese women	RCT	2003	UNCLEAR-women were randomly divided into two groups but method was not specified	UNCLEAR-No details are given for allocation	LOW-Participants were blinded	LOW-Assesors were binded	LOW- 89% was followedup	LOW-all outcomes were measured	LOW- no other sources of bias noted
10	Mumtaz Z et al	Daily Iron Supplementation Is More Effective than Twice Weekly Iron Supplementation in Pregnant Women in Pakistan in a Randomized Double-Blind Clinical Trial	RCT	2000	LOW-Through randome number generationand participants were assigned a unique identifier.	LOW- Codes were assigned	LOW- subjects were blindinddouble blinding	LOW-investigators were blinded	LOW-91% participants were followed up	LOW-all outcomes were measured	LOW- no other sources of bias noted
11	Thuy PV et al	The Use of NaFeEDTA-Fortified Fish Sauce Is an Effective Tool for Controlling Iron Deficiency in Women of Childbearing Age in Rural Vietnam>	RCT	2005	UNCLEAR-procedure is not specified	UNCLEAR- No information specified about allocation	UNCLEAR- Not specified about blinding	UNCLEAR- Not specified about blinding	HIGH- 67% were followed up	LOW-all outcomes were measured	LOW- no other sources of bias noted
12	Ekström EC et al	Efficacy and trial effectiveness of weekly and daily iron supplementation among pregnant women in rural Bangladesh: disentangling the issues	RCT	2002	UNCLEAR-antenatal centers were randomly assigned but proecuder was not	UNCLEAR- No information specified about allocation	UNCLEAR- Not specified about blinding	UNCLEAR- Not specified about blinding	HIGH- 67% were followed up	LOW-all outcomes were measured	LOW- no other sources of bias noted
13	Makola D et al	A Micronutrient-Fortified Beverage Prevents Iron Deficiency, Reduces Anemia and Improves the Hemoglobin Concentration of Pregnant Tanzanian Women	RCT	2003	LOW-block randomization	UNCLEAR- No information specified about allocation	LOW- subjects were blindind since it was double blind	LOW- subjects were blindind since it was double blind	HIGH-59% were foolowed up	LOW-all outcomes were measured	LOW- no other sources of bias noted
14	Mwangi MN et al	Effect of Daily Antenatal Iron Supplementation on Plasmodium Infection in Kenyan Women A Randomized Clinical Trial	RCT	2015	LOW- simple randomization with a 1:1 allocation ratio	LOW- Supplements were given as capsules that were identical in appearance except for shell color. The code linking each color to supplement type was kept in sealed envelopes. Health volunteers not involved in field workers used tables with random numbers to produce sequentially numbered, sealed, opaque envelopes containing the code.	LOW- Participants were blinded to intervention untill data analysis	LOW- field staff were blinded to intervention untill data analysis	LOW- All 100% were followedup	LOW- all outcomes were measured	LOW- no other sources of bias noted
15	Magon A et al	Leaf Concentrate Fortification of Antenatal Protein-Calorie Snacks Improves Pregnancy Outcomes	RCT	2014	LOW-consecutively-numbered envelops randomly assigned to two groups	LOW-sealed enevlop	HIGH-particpants in intervention group could not be blinded due to colour of snack	HIGH- envelop was opened by reasercher when women consented to participate	LOW-89% were followedup	LOW-all outcomes were reported	LOW- no other sources of bias noted
16	Bhutta ZA et al	A Comparative Evaluation of Multiple Micronutrient and Iron–Folic Acid Supplementation during Pregnancy in Pakistan: Impact on Pregnancy Outcomes	RCT	2009	LOW- randome allocation of poulation in clusters according to Block randomization code in groups of 20	LOW- cluster based allocation by distributing sealed and coded supplement bottles independently controlled by AKU phramacy All pregnant women were allocated. A unique code and a uniquely labeled and numerically coded specific supplement supply for the duration of pregnancy, for storage in the field office	LOW-Participants were blinded	LOW- staff (medical officers, community health workers, social scientists, and data collection team) remained completely blinded to the supplement allocation.	HIGH- 41.5% were followed up	LOW- all outcomes were reported	LOW- no other sources of bias noted
17	Sharma JB et al	A prospective, partially randomized study of pregnancy outcomes and hematologic responses to oral and intramuscular iron treatment in moderately anemic pregnant women	Partial randomization	2004	HIGH- Participants were assigned in a balanced, one-for-one manner initially but then assigned exclusively to the oral iron group once complete evaluations were made for 100 subjects in the parenteral iron group	UNCLEAR- details are not specified	UNCLEAR- blinding is not specified	UNCLEAR- Not specified about blinding	LOW- 79% were followed up	LOW- all outcomes were reported	LOW- no other sources of bias noted
18	Zavaleta N et al	Changes in iron status during pregnancy in peruvian women receiving prenatal iron and folic acid supplements with or without zinc.	RCT	2000	LOW-subjects were randomly assigned within parity (nulliparous or multiparous) and gestational age (< or > 17 wk of gestation) STRATA into 2 groups	LOW- All of the supplements had the same brick color and shape and were specially produced in CODED blister packs by a local pharmaceutical company	LOW-Participants were blinded	LOW-Both the health personnel and the investigators were blinded to the coding scheme until analyses of the data were completed	HIGH-63% were followed up	LOW- all outconmes were listed	LOW- no other sources of bias noted
19	Wijaya-Erhardt M et al	Fermented soyabean and vitamin C-rich fruit: a possibility to circumvent the further decrease of iron status among iron-deficient pregnant women in Indonesia.	RCT	2011	UNCLEAR- particpants were randomly allocated at village level but method is not specified	LOW- Each participant received the food in a name-coded plastic box.	UNCLEAR- blinding is not specified	UNCLEAR- Not specified about blinding	LOW- 90% of recruited participants had follow up	LOW- all outcomes were listed	LOW- no other sources of bias noted
20	Khambalia AZ et al	Periconceptional iron supplementation does not reduce anemia or improve iron status among pregnant women in rural Bangladesh.	RCT	2009	UNCLEAR-participants were randomly assigned into two groups but method was not specified	LOW- Nutrients Sachets were identical in appearance, except for a small embossed letter on the back of the sachet to identify the treatment group (“A” or “B”).	LOW-Participants were blinded	LOW-investigators were blinded	LOW- 86% was followup rate	LOW-all outcomews were assessed	LOW- no other sources of bias noted
21	Hall AG et al	An Animal-Source Food Supplement Increases Micronutrient Intakes and Iron Status among Reproductive-Age Women in Rural Vietnam.	RCT	2017	LOW- individuals, stratified by commune health system, randomly assigned to two grps by using the random-number generator for each participant in Excel.	UNCLEAR- details are not specified	HIGH- participants were Unmasked	LOW- Those responsible for data collection, sample analyses, and statistical analyses were masked to group assignment.	LOW- 76% was followup rate	LOW- all outcomes were reported	LOW- no other sources of bias noted
22	Mukhopadhyay A et al	Daily versus intermittent iron supplementation in pregnant women: Hematological and pregnancy outcome	RCT	2004	LOW- Block randomization (block size = 10)	UNCLEAR - details are not specified	UNCLEAR - blinding of participants was not specified	LOW-The technician who performed the laboratory tests was not aware of the group to which the sample was allocated.	LOW- 72% was followed up rate	LOW- all outcomes were reported	LOW- no other sources of bias noted
23	Saha L et al	Comparison of Efficacy, Tolerability, and Cost of Iron Polymaltose Complex With Ferrous Sulphate in the Treatment of Iron Deficiency Anemia in Pregnant Women	RCT	2007	UNCLEAR- randomization was done but procedure is not specified	LOW- Both of the drugs (intervention and control grps) were dispensed in identical capsules	LOW- blinding was ensured for participants	LOW- blinding was done for outcome assessors	LOW- all 100% were followed up	LOW - all outcomes were assessed	LOW- no other sources of bias noted
24	Ahmed F et al	Concomitant supplemental vitamin A enhances the response to weekly supplemental iron and folic acid in anemic teenagers in urban Bangladesh.	RCT
25	Asibey-Berko E et al	Dual fortification of salt with iron and iodine in women and children in rural Ghana	RCT	2007	UNCLEAR-randomly assigned at cluster level but authors hav not described procedure	LOW- Allocation concealment was established by assignment to red, yellow and green labelled salt packages	LOW- partcipants were kept blind	LOW- outcomes assessers were kept blind	HIGH- 61% were followed up	LOW - all outcomes were assessed
26	Suprapto B et al	Effect of low‐dosage vitamin A and riboflavin on iron‐folate supplementation in anaemic pregnant women.	RCT	2002	LOW- women were numbered and listed then allocated alternately into groups according to their numbers	LOW- All supplements had the same colour, shape and size in capsule form and were given in a double blind manner	LOW- Participants were blinded	LOW- midwives and researchers did not know which capsule given to subjects	LOW- 81.5% were followed up	LOW - all outcomes were assessed
27	Hoa PT et al	Milk fortified with iron or iron supplementation to improve nutritional status of pregnant women: an intervention trial from rural Vietnam.	RCT	2005	LOW- Block randomization	UNCLEAR- details are not specified though details of treatment/ supplements are given such as they could not be distinguished by sight	LOW- fortified and non-fortified milk were identical in colour (white), smell and flavour. Also iron supplements and placebo tablet same red colour and shape	UNCLEAR- Not specified about blinding	LOW-83% was the follow up rate	LOW - all outcomes were assessed
28	Adu‐Afarwuah S et al	Impact of small-quantity lipid-based nutrient supplement on hemoglobin, iron status and biomarkers of nflammation in pregnant Ghanaian women	RCT	2017	LOW- block randomization/ computer-generated randomization scheme (in blocks of nine)	LOW- Randomization scheme were placed in sealed, opaque envelopes. Allocation information was kept securely by the Field Supervisor and the Study Statistician only.	LOW- partciapants were kept blind by applying colour coded stickers on blister pack of capsules BUT no info for masking identification of sachet	LOW- laboratory staff and data analyist had no knowledge of group assignment	LOW- all were followed up	LOW - all outcomes were assessed
29	Christian P et al	Treatment response to standard of care for severe anemia in pregnant women and effect of multivitamins and enhanced anthelminthics.	RCT	2009	LOW- Block randomization- women were randomly assigned, in blocks of 4. A list having 800 numbers, ranging from 1 to 4, and generated in randomly arranged blocks of 4, was created.	LOW- Each of the numbers 1–4 was randomly associated with the mebendazole (codes M and U) and multivitamin (codes 1 and 2) treatment codes AND kept in sealed envelops.	LOW- Participants and field staff were masked as antihelminths were kept at same size, shape and inactive colour. And multivitamin and placebo supplements were colored red and identical in shape, size, and color	LOW- investigators were masked as antihelminths were kept at same size, shape and inactive colour. And multivitamin and placebo supplements for pregnant women were colored red and identical in shape, size, and color	LOW- 94.8% were followed up	LOW - all outcomes were assessed
30	Tanumihardjo SA et al	Vitamin A and iron status are improved by vitamin A and iron supplementation in pregnant Indonesian women.	RCT	2002	UNCLEAR- particpants were randomly allocated at individual level but method is not specified	UNCLEAR- details are not specified	LOW- particpants were unaware of treatement group assigned	UNCLEAR- Not specified about blinding	LOW- all were followed up	LOW - all outcomes were assessed
31	Nguyen PH et al	Impact of Preconception Micronutrient Supplementation on Anemia and Iron Status during Pregnancy and Postpartum: A Randomized Controlled Trial in Rural Vietnam.	RCT	2016	UNCLEAR- women were randomly assigned at individual level but method is not specified	LOW-The supplement preparations were physically indistinguishable. The tablet containers were labeled by the manufacturer with letter and color codes that were not disclosed to the researchers	LOW- participants and study personnel were blinded to group assignment	LOW- investigators were blinded to group assignment	LOW- 80% were followed up	LOW - all outcomes were assessed
